# Supplementary material
Source: MDPI journal article supplement (https://www.mdpi.com/2071-1050/14/13/7680)
Supplement: s1 [file s1]

## Supplementary Materials

**Table S1.** Proximate composition (%DM) and energy content (Kj/g DM) of a control diet and eleven agricultural side-streams based on duplicate analysis.

| Side-streams                    | Dry Matter (%) | Protein (% DM) | Lipids (% DM) | Ash (% DM) | Energy (Kj/g) | Supplier               |
|---------------------------------|----------------|----------------|---------------|------------|---------------|------------------------|
| Wheat bran (control ingredient) | 86.7           | 16.9           | 2.2           | 4.6        | 16.7          | Mallias N., Bros O.E.  |
| Sugar beet pulp meal            | 93.7           | 27.6           | 1.8           | 7.5        | 17.3          | Mallias N., Bros O.E.  |
| Cotton cake                     | 91.0           | 26.3           | 6.8           | 4.5        | 18.5          | Mallias N., Bros O.E.  |
| Cotton seed meal                | 92.0           | 25.7           | 14.0          | 4.2        | 20.0          | Local farmer           |
| Sunflower meal                  | 91.7           | 27.6           | 1.6           | 7.0        | 17.1          | Mallias, N., Bros O.E. |
| Barley side-stream (class I)    | 90.3           | 8.0            | 0.6           | 13.5       | 14.5          | Fyto-Animal Services   |
| Barley side-stream (class II)   | 88.6           | 12.1           | 0.6           | 3.3        | 16.2          | Fyto-Animal Services   |
| Oat side-stream                 | 91.2           | 19.3           | 3.4           | 9.3        | 16.9          | Fyto-Animal Services   |
| Pea side-stream (class I)       | 91.0           | 10.9           | 0.0           | 23.1       | 10.9          | Fyto-Animal Services   |
| Pea side-stream (class II)      | 91.0           | 25.4           | 1.2           | 4.6        | 16.3          | Fyto-Animal Services   |
| Vetch side-stream (class I)     | 89.5           | 21.7           | 3.0           | 11.8       | 15.1          | Fyto-Animal Services   |
| Vetch side-stream (class II)    | 91.9           | 25.0           | 1.0           | 11.4       | 14.7          | Fyto-Animal Services   |
| Yeast (control ingredient)      | 97.1           | 50.0           | 1.7           | 6.7        | 19.9          | Angel Yeast Co., Ltd   |

**Table S2.** Inclusion percentages of side-streams in two sets of isoproteinic diets (A=16.9% protein; B=20.0% protein).

| Diet                          |                   |      |      |      |      |                   |      |      |      |      |
|-------------------------------|-------------------|------|------|------|------|-------------------|------|------|------|------|
| Side-streams                  | A1<br>(control A) | A2   | A3   | A4   | A5   | B1<br>(control B) | B2   | B3   | B4   | B5   |
| Wheat bran                    | 100               |      |      |      |      | 90                |      |      |      |      |
| Barley side-stream (class I)  |                   |      | 41.0 | 49.0 |      |                   |      | 15.0 | 30.0 |      |
| Barley side-stream (class II) |                   | 55.0 |      |      | 44.5 |                   | 31.5 |      |      | 10.0 |
| Oat side-stream               |                   |      | 23.0 |      | 27.5 |                   |      | 42.0 |      | 28.0 |
| Pea side-stream (class I)     |                   |      |      |      |      |                   |      |      |      |      |
| Pea side-stream (class II)    |                   | 9.0  |      | 25.5 |      |                   | 38.0 |      | 39.0 |      |
| Vetch side-stream (class I)   |                   | 36.0 |      |      | 28.0 |                   | 30.5 |      |      | 62.0 |
| Vetch side-stream (class II)  |                   |      | 36.0 | 25.5 |      |                   |      | 43.0 | 31.0 |      |
| Yeast                         |                   |      |      |      |      | 10                |      |      |      |      |

**Table S3.** Proximate composition as a % of dry weight basis and energy content (Kj/g DM) of two sets of isoproteinic diets (A=16.9% protein; B=20.0% protein).

| <b>Diet</b> | <b>Dry Matter<br/>(%)</b> | <b>Protein<br/>(% DM)</b> | <b>Lipids<br/>(% DM)</b> | <b>Ash<br/>(% DM)</b> | <b>Energy<br/>(Kj/g)</b> |
|-------------|---------------------------|---------------------------|--------------------------|-----------------------|--------------------------|
| A1          | 86.7                      | 16.9                      | 2.2                      | 4.6                   | 16.7                     |
| A2          | 89.2                      | 16.9                      | 1.5                      | 6.5                   | 15.8                     |
| A3          | 91.1                      | 16.9                      | 1.3                      | 11.8                  | 15.1                     |
| A4          | 90.9                      | 16.9                      | 0.9                      | 10.5                  | 15.0                     |
| A5          | 89.6                      | 16.9                      | 1.9                      | 7.4                   | 16.1                     |
| B1          | 87.7                      | 20.0                      | 2.2                      | 4.8                   | 17.0                     |
| B2          | 89.8                      | 20.0                      | 1.6                      | 6.2                   | 15.9                     |
| B3          | 91.4                      | 20.0                      | 1.8                      | 10.8                  | 15.6                     |
| B4          | 91.1                      | 20.0                      | 1.0                      | 9.2                   | 15.3                     |
| B5          | 89.9                      | 20.0                      | 2.8                      | 10.3                  | 15.7                     |
